# Supplementary material for: Higher Global Diet Quality Score Is Inversely Associated with Risk of Type 2 Diabetes in US Women
Source: PubMed Central journal article supplement (PMC8542093; doi:10.1093/jn/nxab195), 2021-10-23
Supplement: nxab195_supplemental_file.pdf [file nxab195_supplemental_file.pdf]

**Online Supplementary Material**

Supplemental table 1: Scoring criteria (number of points for each intake level) for the Global Diet Quality Score

| <b>Food group</b>              | <b>0 to &lt;1/week</b> | <b>1/week to &lt; 4/week</b> | <b>≥4/week</b> |
|--------------------------------|------------------------|------------------------------|----------------|
| <b>Healthy food groups</b>     |                        |                              |                |
| Dark green leafy vegetables    | 0                      | 2                            | 4              |
| Cruciferous vegetables         | 0                      | 0.25                         | 0.5            |
| Deep orange vegetables         | 0                      | 0.25                         | 0.5            |
| Deep orange fruits             | 0                      | 1                            | 2              |
| Deep orange tubers             | 0                      | 0.25                         | 0.5            |
| Citrus fruits                  | 0                      | 1                            | 2              |
| Other vegetables               | 0                      | 0.25                         | 0.5            |
| Other fruits                   | 0                      | 1                            | 2              |
| Legumes                        | 0                      | 2                            | 4              |
| Nuts and seeds                 | 0                      | 1                            | 2              |
| Poultry                        | 0                      | 1                            | 2              |
| Fish                           | 0                      | 1                            | 2              |
| Whole grains                   | 0                      | 1                            | 2              |
| Liquid oils                    | 0                      | 1                            | 2              |
| Low fat dairy                  | 0                      | 1                            | 2              |
| Eggs                           | 0                      | 1                            | 2              |
| <b>Unhealthy food groups</b>   |                        |                              |                |
| White roots and tubers         | 2                      | 1                            | 0              |
| Process meats                  | 2                      | 1                            | 0              |
| Refined grains and baked goods | 2                      | 1                            | 0              |
| Sugar sweetened beverages      | 2                      | 1                            | 0              |
| Sweets and ice-cream           | 2                      | 1                            | 0              |
| Juices                         | 2                      | 1                            | 0              |
| Fried foods                    | 2                      | 1                            | 0              |
| Red meats                      | 0                      | 1                            | 0              |
| Full fat dairy <sup>1</sup>    | 0                      | 1, 2                         | 0              |

1. 1 point for 1/week to < 4/week, 2 points for 4/week to < 3/day, 0 point for ≥3/day

Supplemental table 2: Multivariable<sup>1</sup> hazard ratio for type 2 diabetes by quintiles of Global Diet Quality Score stratified by pregnancy history and history of gestational diabetes (GDM) in the Nurses' Health Study II ( $n=88,520$ )

|                                             | <b>Q1</b> | <b>Q2</b>         | <b>Q3</b>         | <b>Q4</b>         | <b>Q5</b>         | <b>P trend</b> |
|---------------------------------------------|-----------|-------------------|-------------------|-------------------|-------------------|----------------|
| <b>Pregnancy history<sup>2</sup></b>        |           |                   |                   |                   |                   |                |
| Never pregnant (case=1164)                  | 1         | 0.94 (0.78, 1.13) | 0.88 (0.73,1.06)  | 0.86 (0.71, 1.05) | 0.79 (0.65,0.98)  | 0.005          |
| Ever pregnant (case=5155)                   | 1         | 0.89 (0.82, 0.97) | 0.94 (0.86, 1.02) | 0.87 (0.79, 0.95) | 0.83 (0.75, 0.91) | <0.001         |
| <b>Ever pregnant women only<sup>3</sup></b> |           |                   |                   |                   |                   |                |
| No history of GDM (case=5079)               | 1         | 0.94 (0.86,1.02)  | 0.95 (0.87,1.03)  | 0.90 (0.83,0.99)  | 0.83 (0.76,0.92)  | <0.001         |
| History of GDM (case=933)                   | 1         | 0.81 (0.64,1.02)  | 1.02 (0.81, 1.27) | 0.87 (0.69,1.10)  | 1.02 (0.82, 1.27) | 0.56           |

1. Adjusted for age, BMI, energy intake, smoking, family history of diabetes, oral contraceptive use, menopausal status and postmenopausal hormone use ("all women" analysis only), physical activity, alcohol intake, multivitamin use.

2. p for interaction = 0.06

3. p for interaction = 0.34

Supplemental table 3: Multivariable<sup>1</sup> hazard ratio for type 2 diabetes by quintiles of Global Diet Quality Score stratified by BMI and physical activity in the Nurses' Health Study II (*n*=88,520)

|                                         | Q1 | Q2                | Q3                | Q4                | Q5                | <i>P</i> trend | <i>P</i> interaction |
|-----------------------------------------|----|-------------------|-------------------|-------------------|-------------------|----------------|----------------------|
| <b>All women</b>                        |    |                   |                   |                   |                   |                |                      |
| BMI < 25.0 (case= 347)                  | 1  | 0.77 (0.56, 1.06) | 0.67 (0.48, 0.93) | 0.58 (0.40, 0.82) | 0.65 (0.46, 0.93) | 0.006          |                      |
| BMI ≥ 25.0 (case=5743)                  | 1  | 0.92 (0.85, 0.99) | 0.96 (0.89, 1.04) | 0.89 (0.82, 0.97) | 0.85 (0.77, 0.93) | <0.001         | 0.04                 |
| Physical activity < median (case= 4329) | 1  | 0.92 (0.85, 1.01) | 0.92 (0.84, 1.01) | 0.85 (0.77, 0.94) | 0.87 (0.79, 0.97) | 0.002          |                      |
| Physical activity ≥ median (case= 1990) | 1  | 0.83 (0.71, 0.96) | 0.90 (0.77, 1.04) | 0.83 (0.71, 0.96) | 0.73 (0.62, 0.85) | <0.001         | 0.96                 |
| <b>Women &lt; age 50</b>                |    |                   |                   |                   |                   |                |                      |
| BMI < 25.0 (case= 129)                  | 1  | 0.62 (0.37, 1.02) | 0.51 (0.29, 0.88) | 0.46 (0.26, 0.84) | 0.64 (0.35, 1.14) | 0.03           |                      |
| BMI ≥ 25.0 (case= 2061)                 | 1  | 0.89 (0.78, 1.01) | 1.05 (0.92, 1.20) | 0.92 (0.80, 1.06) | 0.87 (0.75, 1.02) | 0.10           | <0.001               |
| Physical activity < median (case= 1507) | 1  | 0.85 (0.74, 0.99) | 0.96 (0.83, 1.01) | 0.84 (0.71, 0.99) | 0.91 (0.76, 1.10) | 0.08           |                      |
| Physical activity ≥ median (case= 762)  | 1  | 0.88 (0.69, 1.12) | 1.04 (0.82, 1.32) | 0.95 (0.75, 1.21) | 0.78 (0.60, 1.00) | 0.08           | <0.44                |
| <b>Women age 50+</b>                    |    |                   |                   |                   |                   |                |                      |
| BMI < 25.0 (case= 218)                  | 1  | 0.90 (0.60, 1.36) | 0.81 (0.52, 1.24) | 0.67 (0.43, 1.06) | 0.70 (0.44, 1.11) | 0.11           |                      |
| BMI ≥ 25.0 (case= 3682)                 | 1  | 0.93 (0.84, 1.03) | 0.92 (0.83, 1.01) | 0.88 (0.79, 0.97) | 0.83 (0.74, 0.93) | 0.001          | <0.001               |
| Physical activity < median (case= 2822) | 1  | 0.96 (0.87, 1.07) | 0.91 (0.81, 1.02) | 0.86 (0.76, 0.97) | 0.85 (0.75, 0.97) | 0.01           |                      |
| Physical activity ≥ median (case= 1228) | 1  | 0.78 (0.64, 0.95) | 0.81 (0.67, 0.98) | 0.75 (0.62, 0.90) | 0.68 (0.56, 0.82) | <0.001         | 0.72                 |

1. Adjusted for age, BMI, energy intake, smoking, family history of diabetes, oral contraceptive use, menopausal status and postmenopausal hormone use ("all women" analysis only), physical activity, alcohol intake, multivitamin use

Supplemental table 4: Hazard ratio for type 2 diabetes according to quintiles of Alternate Healthy Eating Index-2010 in the Nurses' Health Study II ( $n=88,520$ )

|                            | <b>Q1</b> | <b>Q2</b>         | <b>Q3</b>         | <b>Q4</b>         | <b>Q5</b>         | <b>P trend</b> |
|----------------------------|-----------|-------------------|-------------------|-------------------|-------------------|----------------|
| <b>All women</b>           |           |                   |                   |                   |                   |                |
| Median score               | 37.9      | 45.0              | 50.2              | 56.0              | 64.9              |                |
| No. of cases               | 1812      | 1474              | 1261              | 1049              | 709               |                |
| Person years               | 364,689   | 366,529           | 366,920           | 367,391           | 367,835           |                |
| Age & kcal adjusted        | 1         | 0.80 (0.74, 0.85) | 0.66 (0.61, 0.71) | 0.53 (0.49, 0.58) | 0.35 (0.32, 0.38) | <0.001         |
| Multivariable <sup>1</sup> | 1         | 0.95 (0.89, 1.02) | 0.88 (0.82, 0.95) | 0.80 (0.74, 0.87) | 0.62 (0.56, 0.68) | <0.001         |
| <b>Women &lt; age 50</b>   |           |                   |                   |                   |                   |                |
| Median score               | 36.5      | 43.5              | 48.7              | 54.2              | 62.5              |                |
| No. of cases               | 739       | 535               | 447               | 322               | 223               |                |
| Person years               | 214,332   | 207,304           | 199,858           | 193,004           | 183,253           |                |
| Age & kcal adjusted        | 1         | 0.75 (0.67, 0.84) | 0.65 (0.58, 0.73) | 0.48 (0.42, 0.55) | 0.35 (0.30, 0.41) | <0.001         |
| Multivariable <sup>1</sup> | 1         | 0.91 (0.81, 1.02) | 0.89 (0.78, 1.00) | 0.76 (0.66, 0.88) | 0.64 (0.55, 0.75) | <0.001         |
| <b>Women age ≥50</b>       |           |                   |                   |                   |                   |                |
| Median score               | 40.1      | 47.5              | 52.8              | 58.3              | 66.7              |                |
| No. of cases               | 1073      | 939               | 814               | 727               | 486               |                |
| Person years               | 150,356   | 159,225           | 167,062           | 174,387           | 184,582           |                |
| Age & kcal adjusted        | 1         | 0.83 (0.76, 0.90) | 0.67 (0.61, 0.73) | 0.56 (0.51, 0.62) | 0.35 (0.31, 0.39) | <0.001         |
| Multivariable <sup>1</sup> | 1         | 0.97 (0.89, 1.06) | 0.88 (0.80, 0.96) | 0.83 (0.75, 0.91) | 0.61 (0.54, 0.69) | <0.001         |

1. Adjusted for age, BMI, energy intake, smoking, family history of diabetes, oral contraceptive use, menopausal status and postmenopausal hormone use ("all women" analysis only), physical activity, alcohol intake, multivitamin use

Supplemental table 5: Hazard ratio for type 2 diabetes according to quintiles of Minimum Diet Diversity score for Women in the Nurses' Health Study II ( $n=88,520$ )

|                                       | <b>Q1</b> | <b>Q2</b>         | <b>Q3</b>         | <b>Q4</b>         | <b>Q5</b>         | <b>P trend</b> |
|---------------------------------------|-----------|-------------------|-------------------|-------------------|-------------------|----------------|
| <b>All women</b>                      |           |                   |                   |                   |                   |                |
| Median score                          | 2.5       | 3.7               | 4.3               | 5.0               | 6.0               |                |
| No. of cases                          | 1258      | 1348              | 1216              | 1260              | 1223              |                |
| Person years                          | 345,160   | 367,749           | 386,592           | 368,701           | 365,161           |                |
| Age &kcal adjusted                    | 1         | 0.94 (0.87, 1.02) | 0.80 (0.74, 0.88) | 0.79 (0.72, 0.87) | 0.67 (0.61, 0.74) | <0.001         |
| Multivariable <sup>1</sup>            | 1         | 1.08 (0.99, 1.17) | 1.04 (0.95, 1.13) | 1.11 (1.01, 1.21) | 1.09 (0.99, 1.21) | 0.88           |
| <b>Women &lt; age 50</b>              |           |                   |                   |                   |                   |                |
| Median score                          | 2.3       | 3.5               | 4.0               | 5.0               | 6.0               |                |
| No. of cases                          | 440       | 448               | 462               | 446               | 438               |                |
| Person years                          | 179,652   | 196,562           | 227,925           | 201,628           | 191,986           |                |
| Age &kcal adjusted                    | 1         | 0.94 (0.82, 1.08) | 0.73 (0.63, 0.85) | 0.76 (0.65, 0.88) | 0.67 (0.57, 0.78) | <0.001         |
| Multivariable <sup>1</sup>            | 1         | 1.10 (0.96, 1.26) | 0.98 (0.84, 1.13) | 1.09 (0.93, 1.27) | 1.10 (0.93, 1.29) | 0.64           |
| <b>Women age <math>\geq 50</math></b> |           |                   |                   |                   |                   |                |
| Median score                          | 2.8       | 3.8               | 4.5               | 5.0               | 5.9               |                |
| No. of cases                          | 818       | 868               | 754               | 814               | 785               |                |
| Person years                          | 165,509   | 171,187           | 158,668           | 167,074           | 173,176           |                |
| Age &kcal adjusted                    | 1         | 0.94 (0.85, 1.04) | 0.85 (0.76, 0.95) | 0.81 (0.72, 0.91) | 0.68 (0.60, 0.77) | <0.001         |
| Multivariable <sup>1</sup>            | 1         | 1.07 (0.97, 1.19) | 1.08 (0.97, 1.21) | 1.12 (1.00, 1.26) | 1.10 (0.97, 1.24) | 0.82           |

1. Adjusted for age, BMI, energy intake, smoking, family history of diabetes, oral contraceptive use, menopausal status and postmenopausal hormone use ("all women" analysis only), physical activity, alcohol intake, multivitamin use
